# Supplementary material for: Quality assurance and quality control of atmospheric organosulfates measured using hydrophilic interaction liquid chromatography (HILIC)
Source: Copernicus journal article supplement (doi:10.5194/amt-2023-250), 2024-01-03
Supplement: Supplementary file [file amt-2023-250-RC1-supplement.pdf]

Authors developed a new method about the measurement of major organosulfates in the atmosphere (e.g.,  $C_4H_7SO_7^-$  and  $C_5H_{11}SO_7^-$ ) that can separate them from other compounds in the column. Their results and findings provide a valuable insight to the folks who are interested in studying the chemical behaviors of organosulfates in the atmosphere. However, there are still some issues should be noted and addressed before the paper can be published on the AMT journal.

1. Authors pointed out that the previous method has the co-elution problem that affecting the quantification of OSs, especially for lower-molecular weight and highly polar OSs. Thus, they employed the method of HILIC using amide stationary phase to measure OSs, finding that this method can successfully separate some isoprene-derived OSs (i.e.,  $C_4H_7SO_7^-$  and  $C_5H_{11}SO_7^-$ ) from other atmospheric OA components. However, as shown in Tables 7 and 8, the retention time of most OSs listed is still less than 1 minute. Authors need think more about it. Otherwise, they should clearly claim that the aim of this work is to improve the measurement of specific compounds (i.e.,  $C_5H_{11}SO_7^-$ ).
2. Following Comment 1, there also exist co-elution phenomena for OSs standards by the fact that the retention of time of OSs standards ( $m/z$  148-372) is less than 1 minute. Did authors compare the signal (or area in MS) of pure standard alone to the mixing standards to evaluate the effect of co-elution.
3. It is better to give the detailed equations or calculation processes when extrapolate the result of detection limits in instrument ( $\mu\text{g}/\text{mL}$ ) to that in the atmosphere ( $\text{ng}/\text{m}^3$ ).
4. Line 184-186. It is better to show the standard curves.
5. Figure 1. The specific value for  $m/z$   $\text{HSO}_4^-$  should keep same.  $m/z$  96.9 and  $m/z$  97.1 can not be assigned to the same fragment ion in high resolution MS.
6. Figure 1 and throughout the manuscript: The  $m/z$  values and concentration values must report the same correct number of significant figures.
7. “ $m/z$ ” and “ $k$ ” should be italic. Line 239: “ $\text{SO}_4^-$ ” should be “ $\cdot\text{SO}_4^-$ ”; Line 269: “5.24.6.07” should be “5.24, 6.07”. Authors should also carefully check and correct other typos and grammar errors that are not listed here.
